# Supplementary material for: Prescribing Physical Activity in Parks to Improve Health and Wellbeing: Protocol of the Park Prescription Randomized Controlled Trial
Source: MDPI journal article supplement (doi:10.3390/ijerph15061154), 2018-06-01
Supplement: s1 [file s1]

# Physical Activity Readiness Questionnaire PAR-Q (Circle on the form)

## Eligibility check (Note and circle on the form)

|                                                                                                                                                                                                                           |                                                                                                                                                                                                                                                                                                                                                                                          |    |
|---------------------------------------------------------------------------------------------------------------------------------------------------------------------------------------------------------------------------|------------------------------------------------------------------------------------------------------------------------------------------------------------------------------------------------------------------------------------------------------------------------------------------------------------------------------------------------------------------------------------------|----|
| Age (40-65)                                                                                                                                                                                                               |                                                                                                                                                                                                                                                                                                                                                                                          |    |
| Able to write/read                                                                                                                                                                                                        | Yes                                                                                                                                                                                                                                                                                                                                                                                      | No |
| Lower limb disorders                                                                                                                                                                                                      | Yes                                                                                                                                                                                                                                                                                                                                                                                      | No |
| Physical disabilities                                                                                                                                                                                                     | Yes                                                                                                                                                                                                                                                                                                                                                                                      | No |
| How much do you exercise per week, on most weeks?<br><br>Examples;<br>Moderate- intensity aerobic activity (e.g. brisk walking) or<br>Vigorous- intensity aerobic activity (e.g. running, jogging or playing basketball)? | <input type="checkbox"/> up to 30 minutes<br><input type="checkbox"/> up to 1 hour (less than 60 minutes)<br><input type="checkbox"/> up to 1,5 hours (less than 90 minutes)<br><input type="checkbox"/> up to 2 hours (less than 120 minutes)<br><input type="checkbox"/> up to 2,5 hours (less than 150 minutes)<br><input type="checkbox"/> more than 2,5 hours (150 minutes or more) |    |
| 1. Has anyone in your immediate family (mother, father, sister or brother) had a heart attack or died suddenly of a heart related disorder before age 55 (men) or 65 (women)?                                             | Yes                                                                                                                                                                                                                                                                                                                                                                                      | No |
| 2. Has your doctor informed you that you have any of these conditions? (check all that apply)                                                                                                                             |                                                                                                                                                                                                                                                                                                                                                                                          |    |
| <input type="checkbox"/> Heart condition or disease (also includes any type of heart surgery)                                                                                                                             | Yes                                                                                                                                                                                                                                                                                                                                                                                      | No |
| <input type="checkbox"/> Stroke                                                                                                                                                                                           | Yes                                                                                                                                                                                                                                                                                                                                                                                      | No |
| 3. Has your doctor informed you that you have any of these conditions? (check all that apply)                                                                                                                             |                                                                                                                                                                                                                                                                                                                                                                                          |    |
| <input type="checkbox"/> Lung disease (e.g. chronic obstructive pulmonary disease/COPD or asthma)                                                                                                                         | Yes                                                                                                                                                                                                                                                                                                                                                                                      | No |
| <input type="checkbox"/> Diabetes                                                                                                                                                                                         | Yes                                                                                                                                                                                                                                                                                                                                                                                      | No |
| 4. In the past 1 year, have you had chest pain when you engage in physical activity or when at rest?                                                                                                                      | Yes                                                                                                                                                                                                                                                                                                                                                                                      | No |
| 5. Do you ever experience dizziness or even lose consciousness?                                                                                                                                                           | Yes                                                                                                                                                                                                                                                                                                                                                                                      | No |
| 6. Do you have any bone, joint or muscle problem (e.g. back, knee, hip, shoulder or ankle) that could be made worse by participating in exercise?                                                                         | Yes                                                                                                                                                                                                                                                                                                                                                                                      | No |
| 7. Do you take tablets for high blood pressure and either continue to have <b>poorly controlled</b> high blood pressure, or you <b>do not</b> follow up with a doctor on a regular basis?                                 | Yes                                                                                                                                                                                                                                                                                                                                                                                      | No |
| 8. Are you currently pregnant?                                                                                                                                                                                            | Yes                                                                                                                                                                                                                                                                                                                                                                                      | No |
| 9. Do you know of any reason why participating in exercise or any other physical activity might be harmful to your health?                                                                                                | Yes                                                                                                                                                                                                                                                                                                                                                                                      | No |

Participant ID:

\_\_\_\_\_

I have answered all previous questions honestly and to the best of my knowledge.

I hereby declare the above to be true reports of my medical history and current conditions and feel fit to participate in physical activity.

Participant Signature: \_\_\_\_\_

Date: \_\_\_\_\_

NUS Staff Name: \_\_\_\_\_

NUS Staff Signature: \_\_\_\_\_

Date: \_\_\_\_\_
